# Supplementary material
Source: publisher figshare collection journal article supplement (https://acs.figshare.com/ndownloader/files/16237262)
Supplement: Supplementary file 1 [file 16237262]

# Supporting Information

## Computational Model to Predict the Fraction of Unbound Drug in the Brain

*Tsuyoshi Esaki<sup>\*,#</sup>, Rikiya Ohashi<sup>#,‡</sup>, Reiko Watanabe<sup>#</sup>, Yayoi Natsume-Kitatani<sup>#,†</sup>, Hitoshi  
Kawashima<sup>#</sup>, Chioko Nagao<sup>#,†</sup>, Kenji Mizuguchi<sup>\*,#,†</sup>*

<sup>#</sup> Laboratory of Bioinformatics, National Institutes of Biomedical Innovation, Health and  
Nutrition, 7-6-8 Saito-Asagi, Ibaraki, Osaka, 567-0085, Japan

<sup>‡</sup> Discovery Technology Laboratories, Mitsubishi Tanabe Pharma Corporation, 2-2-50  
Kawagishi, Toda, Saitama, 335-8505, Japan

<sup>†</sup> Laboratory of In-silico Drug Design, Center of Drug Design Research, National Institutes of  
Biomedical Innovation, Health and Nutrition, 7-6-8 Saito-Asagi, Ibaraki, Osaka, 567-0085,  
Japan

### Corresponding Author

\* (T.E.) E-mail: [tsuyoshi-esaki@nibiohn.go.jp](mailto:tsuyoshi-esaki@nibiohn.go.jp)

\* (K. M.) E-mail: [kenji@nibiohn.go.jp](mailto:kenji@nibiohn.go.jp)

**Table S1. List of the Compounds used in this Study.**

| ChEMBL ID     | Name <sup>a</sup> | Dataset <sup>b</sup> | Obs. value <sup>c</sup> |
|---------------|-------------------|----------------------|-------------------------|
| CHEMBL1004    | DOXYLAMINE        | Training             | 0.038                   |
| CHEMBL1106    | EPINASTINE        | Training             | 0.603                   |
| CHEMBL111     | RIMONABANT        | Training             | 0.0004875               |
| CHEMBL112     | ACETAMINOPHEN     | Training             | 0.832                   |
| CHEMBL1172    | DESLORATADINE     | Training             | 0.007                   |
| CHEMBL1185    | ZOLMITRIPTAN      | Training             | 0.537                   |
| CHEMBL1201201 | METHAMPHETAMINE   | Training             | 0.05                    |
| CHEMBL122     | ROFECOXIB         | Training             | 0.081                   |
| CHEMBL1237044 | TRAMADOL          | Training             | 0.356                   |
| CHEMBL125     | MILTEFOSINE       | Training             | 0.083                   |
| CHEMBL1256    | ISOFLURANE        | Training             | 0.087                   |
| CHEMBL1276947 |                   | Training             | 0.023                   |
| CHEMBL1276948 |                   | Training             | 0.032                   |
| CHEMBL1277126 |                   | Training             | 0.027                   |
| CHEMBL1277312 |                   | Training             | 0.04                    |
| CHEMBL1277678 |                   | Training             | 0.02                    |
| CHEMBL1277770 |                   | Training             | 0.031                   |
| CHEMBL1277935 |                   | Training             | 0.03                    |
| CHEMBL1278    | NARATRIPTAN       | Training             | 0.229                   |
| CHEMBL1286    | LEVETIRACETAM     | Training             | 1                       |
| CHEMBL129     | ZIDOVUDINE        | Training             | 0.95                    |
| CHEMBL131     | PREDNISOLONE      | Training             | 0.204                   |
| CHEMBL1324    | TOLCAPONE         | Training             | 0.00875                 |
| CHEMBL13280   | FLUNITRAZEPAM     | Training             | 0.219                   |

| ChEMBL ID     | Name <sup>a</sup> | Dataset <sup>b</sup> | Obs. value <sup>c</sup> |
|---------------|-------------------|----------------------|-------------------------|
| CHEMBL134     | CLONIDINE         | Training             | 0.42                    |
| CHEMBL1380    | ABACAVIR          | Training             | 0.832                   |
| CHEMBL1428    | NIMODIPINE        | Training             | 0.013                   |
| CHEMBL1431    | METFORMIN         | Training             | 0.95                    |
| CHEMBL1434    | MINOCYCLINE       | Training             | 0.457                   |
| CHEMBL14370   | REBOXETINE        | Training             | 0.05                    |
| CHEMBL1457    | HYDROCODONE       | Training             | 0.465                   |
| CHEMBL146227  |                   | Training             | 0.24                    |
| CHEMBL1464    | WARFARIN          | Training             | 0.25375                 |
| CHEMBL1471    | APREPITANT        | Training             | 0.001375                |
| CHEMBL1510    | ELETRIPTAN        | Training             | 0.055                   |
| CHEMBL159     | VINBLASTINE       | Training             | 0.005                   |
| CHEMBL16      | PHENYTOIN         | Training             | 0.12011111              |
| CHEMBL160     | CYCLOSPORINE      | Training             | 0.025                   |
| CHEMBL1621    | PALIPERIDONE      | Training             | 0.111481818             |
| CHEMBL1751    | DIGOXIN           | Training             | 0.214                   |
| CHEMBL177756  | FLUORESCEIN       | Training             | 0.42                    |
| CHEMBL1830693 |                   | Training             | 0.014                   |
| CHEMBL1830698 |                   | Training             | 0.0043                  |
| CHEMBL1830707 |                   | Training             | 0.0043                  |
| CHEMBL1830711 |                   | Training             | 0.016                   |
| CHEMBL2146883 | COBIMETINIB       | Training             | 0.0012                  |
| CHEMBL2151817 |                   | Training             | 0.01                    |
| CHEMBL21578   | QUINIDINE         | Training             | 0.0615                  |
| CHEMBL2164048 |                   | Training             | 0.003                   |

| ChEMBL ID     | Name <sup>a</sup> | Dataset <sup>b</sup> | Obs. value <sup>c</sup> |
|---------------|-------------------|----------------------|-------------------------|
| CHEMBL2204445 |                   | Training             | 0.01                    |
| CHEMBL220492  | TOPIRAMATE        | Training             | 0.5285                  |
| CHEMBL2349466 |                   | Training             | 0.1                     |
| CHEMBL2349467 |                   | Training             | 0.0285                  |
| CHEMBL2349468 |                   | Training             | 0.006                   |
| CHEMBL2349469 |                   | Training             | 0.018                   |
| CHEMBL2349470 |                   | Training             | 0.097                   |
| CHEMBL2349471 |                   | Training             | 0.1                     |
| CHEMBL2349472 |                   | Training             | 0.003                   |
| CHEMBL2349475 |                   | Training             | 0.013                   |
| CHEMBL2349476 |                   | Training             | 0.034                   |
| CHEMBL2349478 |                   | Training             | 0.012                   |
| CHEMBL2349480 |                   | Training             | 0.22                    |
| CHEMBL2349490 |                   | Training             | 0.004                   |
| CHEMBL2349504 |                   | Training             | 0.03                    |
| CHEMBL24      | ATENOLOL          | Training             | 0.9                     |
| CHEMBL2403769 |                   | Training             | 0.031                   |
| CHEMBL2418359 |                   | Training             | 0.051                   |
| CHEMBL2418364 |                   | Training             | 0.023                   |
| CHEMBL260374  | THIOPERAMIDE      | Training             | 0.363                   |
| CHEMBL267894  | AMOBARBITAL       | Training             | 0.49                    |
| CHEMBL273575  | NOMIFENSINE       | Training             | 0.002                   |
| CHEMBL278020  | NEOSTIGMINE       | Training             | 0.95                    |
| CHEMBL281786  | DIPRENORPHINE     | Training             | 0.309                   |
| CHEMBL28218   | BROMPERIDOL       | Training             | 0.009                   |

| ChEMBL ID     | Name <sup>a</sup> | Dataset <sup>b</sup> | Obs. value <sup>c</sup> |
|---------------|-------------------|----------------------|-------------------------|
| CHEMBL3127106 |                   | Training             | 0.09                    |
| CHEMBL3298273 |                   | Training             | 0.02                    |
| CHEMBL3331521 |                   | Training             | 0.14                    |
| CHEMBL334491  | BUDIPINE          | Training             | 0.018                   |
| CHEMBL3353290 |                   | Training             | 0.006                   |
| CHEMBL3357656 |                   | Training             | 0.037                   |
| CHEMBL3357661 |                   | Training             | 0.04                    |
| CHEMBL3359272 |                   | Training             | 0.015                   |
| CHEMBL3422018 |                   | Training             | 0.031                   |
| CHEMBL34259   | METHOTREXATE      | Training             | 0.89                    |
| CHEMBL3608680 |                   | Training             | 0.525                   |
| CHEMBL3608684 |                   | Training             | 0.436                   |
| CHEMBL3608688 |                   | Training             | 0.109                   |
| CHEMBL3608740 |                   | Training             | 0.604                   |
| CHEMBL3608741 |                   | Training             | 0.995                   |
| CHEMBL3617649 |                   | Training             | 0.032                   |
| CHEMBL363295  | TERODILINE        | Training             | 0.05375                 |
| CHEMBL3633720 |                   | Training             | 0.09                    |
| CHEMBL3633881 |                   | Training             | 0.16                    |
| CHEMBL3633943 |                   | Training             | 0.51                    |
| CHEMBL3634122 |                   | Training             | 0.029                   |
| CHEMBL3634340 |                   | Training             | 0.019                   |
| CHEMBL3746457 |                   | Training             | 0.055                   |
| CHEMBL3747116 |                   | Training             | 0.065                   |
| CHEMBL3799685 |                   | Training             | 0.001                   |

| ChEMBL ID     | Name <sup>a</sup> | Dataset <sup>b</sup> | Obs. value <sup>c</sup> |
|---------------|-------------------|----------------------|-------------------------|
| CHEMBL3808485 |                   | Training             | 0.03                    |
| CHEMBL384467  | DEXAMETHASONE     | Training             | 0.38                    |
| CHEMBL424     | SALICYLIC         | Training             | 0.63                    |
| CHEMBL428647  | PACLITAXEL        | Training             | 0.0075                  |
| CHEMBL441     | THIOPENTAL        | Training             | 0.16                    |
| CHEMBL44657   | ETOPOSIDE         | Training             | 0.603                   |
| CHEMBL485     | CODEINE           | Training             | 0.62                    |
| CHEMBL492591  |                   | Training             | 1                       |
| CHEMBL493     | BROMOCRIPTINE     | Training             | 0.001875                |
| CHEMBL502     | DONEPEZIL         | Training             | 0.10725                 |
| CHEMBL53463   | DOXORUBICIN       | Training             | 0.001                   |
| CHEMBL546     | OXPRENOLOL        | Training             | 0.28                    |
| CHEMBL56564   | TROPISETRON       | Training             | 0.05425                 |
| CHEMBL593     | DELAVIRDINE       | Training             | 0.022                   |
| CHEMBL596     | FENTANYL          | Training             | 0.071                   |
| CHEMBL596809  |                   | Training             | 0.027                   |
| CHEMBL597190  |                   | Training             | 0.006                   |
| CHEMBL607     | MEPERIDINE        | Training             | 0.054                   |
| CHEMBL608151  |                   | Training             | 0.014                   |
| CHEMBL610795  |                   | Training             | 0.001                   |
| CHEMBL629     | AMITRIPTYLINE     | Training             | 0.01                    |
| CHEMBL634     | ALFENTANIL        | Training             | 0.324                   |
| CHEMBL636     | RIVASTIGMINE      | Training             | 0.3755                  |
| CHEMBL639     | AZELASTINE        | Training             | 0.012375                |
| CHEMBL649     | NADOLOL           | Training             | 0.78                    |

| ChEMBL ID     | Name <sup>a</sup> | Dataset <sup>b</sup> | Obs. value <sup>c</sup> |
|---------------|-------------------|----------------------|-------------------------|
| CHEMBL651     | METHADONE         | Training             | 0.029                   |
| CHEMBL656     | OXYCODONE         | Training             | 0.66                    |
| CHEMBL657     | DIPHENHYDRAMINE   | Training             | 0.0472                  |
| CHEMBL658     | SUFENTANIL        | Training             | 0.034                   |
| CHEMBL70      | MORPHINE          | Training             | 0.7105                  |
| CHEMBL701     | BACLOFEN          | Training             | 0.98                    |
| CHEMBL71      | CHLORPROMAZINE    | Training             | 0.00293                 |
| CHEMBL72      | DESIPRAMINE       | Training             | 0.0115                  |
| CHEMBL7413    | METHOHEXITAL      | Training             | 0.331                   |
| CHEMBL74926   | PHENSERINE        | Training             | 0.065                   |
| CHEMBL7728    | HEXOBARBITAL      | Training             | 0.417                   |
| CHEMBL809     | SERTRALINE        | Training             | 0.001                   |
| CHEMBL81923   | DEHYDROEVODIAMINE | Training             | 0.355                   |
| CHEMBL855     | TRIPROLIDINE      | Training             | 0.091                   |
| CHEMBL856     | PRIMIDONE         | Training             | 0.851                   |
| CHEMBL894     | BUPROPION         | Training             | 0.1689                  |
| CHEMBL9       | NORFLOXACIN       | Training             | 0.58                    |
| CHEMBL905     | RIZATRIPTAN       | Training             | 0.347                   |
| CHEMBL939     | GEFITINIB         | Training             | 0.191                   |
| CHEMBL963     | OXYMORPHONE       | Training             | 0.75                    |
| CHEMBL1000    | CETIRIZINE        | Test                 | 0.309                   |
| CHEMBL1112    | ARIPIPRAZOLE      | Test                 | 0.001125                |
| CHEMBL1200733 | DESFLURANE        | Test                 | 0.219                   |
| CHEMBL1595    | DIHYDROCODEINE    | Test                 | 0.141                   |
| CHEMBL170     | QUININE           | Test                 | 0.082                   |

| ChEMBL ID     | Name <sup>a</sup> | Dataset <sup>b</sup> | Obs. value <sup>c</sup> |
|---------------|-------------------|----------------------|-------------------------|
| CHEMBL190     | THEOPHYLLINE      | Test                 | 0.562                   |
| CHEMBL2057392 |                   | Test                 | 0.009                   |
| CHEMBL2426616 |                   | Test                 | 0.18                    |
| CHEMBL2431173 |                   | Test                 | 0.016                   |
| CHEMBL278255  | CLINAFLOXACIN     | Test                 | 0.264                   |
| CHEMBL28509   | EDELFOSE          | Test                 | 0.014                   |
| CHEMBL33      | LEVOFLOXACIN      | Test                 | 0.84                    |
| CHEMBL3357669 |                   | Test                 | 0.0135                  |
| CHEMBL3422010 |                   | Test                 | 0.028                   |
| CHEMBL3527069 |                   | Test                 | 0.0228                  |
| CHEMBL3527070 |                   | Test                 | 0.004115                |
| CHEMBL3617655 |                   | Test                 | 0.0435                  |
| CHEMBL3617658 |                   | Test                 | 0.033                   |
| CHEMBL3634123 |                   | Test                 | 0.101                   |
| CHEMBL3634125 |                   | Test                 | 0.044                   |
| CHEMBL3634341 |                   | Test                 | 0.01                    |
| CHEMBL3634342 |                   | Test                 | 0.039                   |
| CHEMBL3823424 |                   | Test                 | 0.098                   |
| CHEMBL389621  | HYDROCORTISONE    | Test                 | 0.178                   |
| CHEMBL407     | FLUMAZENIL        | Test                 | 0.832                   |
| CHEMBL419296  | ZOLANTIDINE       | Test                 | 0.023                   |
| CHEMBL500     | PINDOLOL          | Test                 | 0.4                     |
| CHEMBL521982  |                   | Test                 | 0.001                   |
| CHEMBL554     | LAPATINIB         | Test                 | 0.011                   |
| CHEMBL70209   | ZALTIDINE         | Test                 | 0.631                   |



| ChEMBL ID     | Name <sup>a</sup> | Dataset <sup>b</sup> | Obs. value <sup>c</sup> |
|---------------|-------------------|----------------------|-------------------------|
| CHEMBL744     | RILUZOLE          | Test                 | 0.011625                |
| CHEMBL750     | ZONISAMIDE        | Test                 | 0.43                    |
| CHEMBL814     | FLUVOXAMINE       | Test                 | 0.0205                  |
| CHEMBL84      | TOPOTECAN         | Test                 | 0.912                   |
| CHEMBL8809    | RACLOPRIDE        | Test                 | 0.129                   |
| CHEMBL953     | ENTACAPONE        | Test                 | 0.02275                 |
| CHEMBL1088    | MESORIDAZINE      | Wan                  | 0.025                   |
| CHEMBL1113    | AMOXAPINE         | Wan                  | 0.01                    |
| CHEMBL1233    | CARISOPRODOL      | Wan                  | 0.335                   |
| CHEMBL128     | SUMATRIPTAN       | Wan                  | 0.5435                  |
| CHEMBL1628227 | DOXEPIN           | Wan                  | 0.025                   |
| CHEMBL21731   | MAPROTILINE       | Wan                  | 0.006                   |
| CHEMBL41      | FLUOXETINE        | Wan                  | 0.0028                  |
| CHEMBL42      | CLOZAPINE         | Wan                  | 0.01065                 |
| CHEMBL445     | NORTRIPTYLINE     | Wan                  | 0.00622                 |
| CHEMBL49      | BUSPIRONE         | Wan                  | 0.2111                  |
| CHEMBL531     | PERGOLIDE         | Wan                  | 0.027                   |
| CHEMBL567     | PERPHENAZINE      | Wan                  | 0.004                   |
| CHEMBL621     | TRAZODONE         | Wan                  | 0.0682                  |
| CHEMBL637     | VENLAFAXINE       | Wan                  | 0.205                   |
| CHEMBL654     | MIRTAZAPINE       | Wan                  | 0.065                   |
| CHEMBL660     | AMANTADINE        | Wan                  | 0.1985                  |
| CHEMBL669     | CYCLOBENZAPRINE   | Wan                  | 0.0046                  |
| CHEMBL715     | OLANZAPINE        | Wan                  | 0.034                   |
| CHEMBL716     | QUETIAPINE        | Wan                  | 0.025                   |

| ChEMBL ID     | Name <sup>a</sup> | Dataset <sup>b</sup> | Obs. value <sup>c</sup> |
|---------------|-------------------|----------------------|-------------------------|
| CHEMBL741     | LAMOTRIGINE       | Wan                  | 0.24675                 |
| CHEMBL796     | METHYLPHENIDATE   | Wan                  | 0.195                   |
| CHEMBL831     | LOXAPINE          | Wan                  | 0.011                   |
| CHEMBL85      | RISPERIDONE       | Wan                  | 0.07076                 |
| CHEMBL896     | HYDROXYZINE       | Wan                  | 0.011366667             |
| CHEMBL911     | ZOLPIDEM          | Wan                  | 0.15                    |
| CHEMBL95      | TACRINE           | Wan                  | 0.142                   |
| CHEMBL972     | SELEGILINE        | Wan                  | 0.064333333             |
| CHEMBL1017    | TELMISARTAN       | Mateus               | 0.012875                |
| CHEMBL103     | PROGESTERONE      | Mateus               | 0.046                   |
| CHEMBL1098    | BUPIVACAINE       | Mateus               | 0.2055                  |
| CHEMBL11      | IMIPRAMINE        | Mateus               | 0.035                   |
| CHEMBL114     | SAQUINAVIR        | Mateus               | 0.0029                  |
| CHEMBL115     | INDINAVIR         | Mateus               | 0.072                   |
| CHEMBL116     | AMPRENAVIR        | Mateus               | 0.091                   |
| CHEMBL13      | METOPROLOL        | Mateus               | 0.46                    |
| CHEMBL139     | DICLOFENAC        | Mateus               | 0.041                   |
| CHEMBL1477    | CERIVASTATIN      | Mateus               | 0.048                   |
| CHEMBL1484    | NICARDIPINE       | Mateus               | 0.005625                |
| CHEMBL152067  | TALINOLOL         | Mateus               | 0.1495                  |
| CHEMBL163     | RITONAVIR         | Mateus               | 0.018222222             |
| CHEMBL1790041 | RANITIDINE        | Mateus               | 0.955                   |
| CHEMBL266195  | ALPRENOLOL        | Mateus               | 0.057                   |
| CHEMBL267930  | SPIPERONE         | Mateus               | 0.037                   |
| CHEMBL295698  | KETOCONAZOLE      | Mateus               | 0.012                   |

| ChEMBL ID    | Name <sup>a</sup> | Dataset <sup>b</sup> | Obs. value <sup>c</sup> |
|--------------|-------------------|----------------------|-------------------------|
| CHEMBL30     | CIMETIDINE        | Mateus               | 0.6425                  |
| CHEMBL374478 | RIFAMPICIN        | Mateus               | 0.13                    |
| CHEMBL415    | CLOMIPRAMINE      | Mateus               | 0.004                   |
| CHEMBL421    | SULFASALAZINE     | Mateus               | 0.063                   |
| CHEMBL46     | ONDANSETRON       | Mateus               | 0.049                   |
| CHEMBL498    | CHLORPROPAMIDE    | Mateus               | 0.68775                 |
| CHEMBL503    | LOVASTATIN        | Mateus               | 0.008                   |
| CHEMBL52440  | DEXTROMETHORPHAN  | Mateus               | 0.2                     |
| CHEMBL568    | OXAZEPAM          | Mateus               | 0.037                   |
| CHEMBL58     | MITOXANTRONE      | Mateus               | 0.0046                  |
| CHEMBL584    | NELFINAVIR        | Mateus               | 0.00336                 |
| CHEMBL6      | INDOMETHACIN      | Mateus               | 0.045333333             |
| CHEMBL644    | TRIMIPRAMINE      | Mateus               | 0.007                   |
| CHEMBL661    | ALPRAZOLAM        | Mateus               | 0.16                    |
| CHEMBL6966   | VERAPAMIL         | Mateus               | 0.0425                  |
| CHEMBL79     | LIDOCAINE         | Mateus               | 0.2795                  |
| CHEMBL841    | LOPERAMIDE        | Mateus               | 0.0095                  |
| CHEMBL850    | SPARFLOXACIN      | Mateus               | 0.257                   |
| CHEMBL914    | FEXOFENADINE      | Mateus               | 0.078                   |
| CHEMBL998    | LORATADINE        | Mateus               | 0.002                   |
| CHEMBL108    | CARBAMAZEPINE     | Wan, Mateus          | 0.184                   |
| CHEMBL12     | DIAZEPAM          | Wan, Mateus          | 0.0405                  |
| CHEMBL27     | PROPRANOLOL       | Wan, Mateus          | 0.020666667             |
| CHEMBL479    | THIORIDAZINE      | Wan, Mateus          | 0.000835                |
| CHEMBL490    | PAROXETINE        | Wan, Mateus          | 0.003955                |

| ChEMBL ID | Name <sup>a</sup> | Dataset <sup>b</sup> | Obs. value <sup>c</sup> |
|-----------|-------------------|----------------------|-------------------------|
| CHEMBL54  | HALOPERIDOL       | Wan, Mateus          | 0.0074                  |
| CHEMBL549 | CITALOPRAM        | Wan, Mateus          | 0.043818182             |
| CHEMBL655 | MIDAZOLAM         | Wan, Mateus          | 0.02275                 |
| CHEMBL86  | METOCLOPRAMIDE    | Wan, Mateus          | 0.270583333             |

<sup>a</sup> Names were collected from ChEMBL using their ChEMBL ID. <sup>b</sup> Dataset used in this study (Training: 144 compounds, Test: 36 compounds, Wan: Wan's 36 compounds<sup>1</sup>, Mateus: Mateus' 46 compounds<sup>2</sup>). <sup>c</sup> Obtained from previous studies.

**Table S2. List of the 53 Descriptors Selected by Boruta.**

| Descriptor                  | Detail                                                                                 | meanImp <sup>a</sup> |
|-----------------------------|----------------------------------------------------------------------------------------|----------------------|
| SLogP <sup>c</sup>          | Wildman-Crippen LogP                                                                   | 9.758                |
| SMR_VSA7 <sup>c</sup>       | MOE MR VSA Descriptor 7 (3.05 <= x < 3.63)                                             | 6.482                |
| AETA_alpha <sup>c</sup>     | averaged ETA core count                                                                | 4.875                |
| khs.aaCH <sup>b</sup>       | Counts the number of occurrences of the E-state fragments                              | 4.665                |
| AATSC0p <sup>c</sup>        | averaged and centered moreau-broto autocorrelation of lag 0 weighted by polarizability | 4.547                |
| APC2D6_C_X <sup>d</sup>     | Count of C-X at topological distance 6                                                 | 4.249                |
| APC2D7_C_N <sup>d</sup>     | Count of C-N at topological distance 7                                                 | 4.086                |
| AATS5p <sup>c</sup>         | averaged moreau-broto autocorrelation of lag 5 weighted by polarizability              | 4.078                |
| ATSC0m <sup>c</sup>         | centered moreau-broto autocorrelation of lag 0 weighted by mass                        | 3.953                |
| FPSA3 <sup>c</sup>          | fractional charged partial positive surface area (version 3)                           | 3.934                |
| tpsaEfficiency <sup>b</sup> | Polar surface area expressed as a ratio to molecular size                              | 3.891                |
| SubFPC274 <sup>d</sup>      | Count of aromatic substructure                                                         | 3.872                |
| ZMIC1 <sup>c</sup>          | 1-ordered Z-modified information content                                               | 3.674                |
| GATS1i <sup>c</sup>         | geary coefficient of lag 1 weighted by ionization potential                            | 3.599                |
| AATS1p <sup>c</sup>         | averaged moreau-broto autocorrelation of lag 1 weighted by polarizability              | 3.581                |
| AATS2i <sup>c</sup>         | averaged moreau-broto autocorrelation of lag 2 weighted by ionization potential        | 3.546                |
| AATSC0v <sup>c</sup>        | Count of C-Cl at topological distance 5                                                | 3.539                |
| ETA_psi_1 <sup>c</sup>      | ETA psi                                                                                | 3.524                |

| Descriptor              | Detail                                                                                                | meanImp <sup>a</sup> |
|-------------------------|-------------------------------------------------------------------------------------------------------|----------------------|
| GATS1p <sup>c</sup>     | geary coefficient of lag 1 weighted by polarizability                                                 | 3.496                |
| n6aRing <sup>c</sup>    | 6-membered aromatic ring count                                                                        | 3.488                |
| APC2D9_C_X <sup>d</sup> | Count of C-X at topological distance 9                                                                | 3.483                |
| VR2_A <sup>c</sup>      | Calculates atom additive logP and molar refractivity values as described by Ghose and Crippen         | 3.478                |
| AATSC0m <sup>c</sup>    | Polar surface area expressed as a ratio to molecular size                                             | 3.457                |
| ZMIC2 <sup>c</sup>      | 2-ordered Z-modified information content                                                              | 3.397                |
| ETA_eta_FL <sup>c</sup> | spectral moment from Distance matrix                                                                  | 3.355                |
| AATSC0c <sup>c</sup>    | averaged and centered moreau-broto autocorrelation of lag 0 weighted by gasteiger charge              | 3.308                |
| AATS5v <sup>c</sup>     | Calculates atom additive logP and molar refractivity values                                           | 3.307                |
| PEOE_VSA6 <sup>c</sup>  | MOE Charge VSA Descriptor 6 (-0.10 <= x < -0.05)                                                      | 3.279                |
| AMID_O <sup>c</sup>     | averaged molecular ID on O atoms                                                                      | 3.254                |
| SubFPC307 <sup>d</sup>  | Count of chiral center specified substructure                                                         | 3.190                |
| MATS1f <sup>c</sup>     | moran coefficient of lag 1 weighted by ionization potential                                           | 3.164                |
| MDEC-22 <sup>b</sup>    | molecular distance edge between secondary C and secondary C                                           | 3.162                |
| AATS0p <sup>c</sup>     | averaged moreau-broto autocorrelation of lag 0 weighted by polarizability                             | 3.148                |
| THSA <sup>b</sup>       | sum of solvent accessible surface areas of atoms with absolute value of partial charges less than 0.2 | 3.069                |
| SaasC <sup>c</sup>      | Count of dialkylether                                                                                 | 3.050                |
| MATS1se <sup>c</sup>    | Count of C-Cl at topological distance 9                                                               | 2.998                |

| Descriptor                  | Detail                                                                                       | meanImp <sup>a</sup> |
|-----------------------------|----------------------------------------------------------------------------------------------|----------------------|
| AATS0m <sup>c</sup>         | Predicted logP based on the atom-type method                                                 | 2.797                |
| AATSC1c <sup>c</sup>        | averaged and centered moreau-broto autocorrelation of lag 1 weighted by gasteiger charge     | 2.773                |
| ETA_dEpsilon_B <sup>c</sup> | ETA delta epsilon (type: B)                                                                  | 2.687                |
| AATSC1f <sup>c</sup>        | averaged and centered moreau-broto autocorrelation of lag 1 weighted by ionization potential | 2.674                |
| AMR <sup>b</sup>            | the Ghose-Crippen molar refractivity                                                         | 2.571                |
| APC2D8_C_X <sup>d</sup>     | Count of C-X at topological distance 8                                                       | 2.552                |
| APC2D8_C_N <sup>d</sup>     | Count of C-N at topological distance 8                                                       | 2.522                |
| RPCS <sup>c</sup>           | relative positive charge surface area                                                        | 2.491                |
| RPSA <sup>c</sup>           | relative polar surface area                                                                  | 2.448                |
| APC2D7_C_X <sup>d</sup>     | Count of C-X at topological distance 7                                                       | 2.385                |
| MDEC-23 <sup>b</sup>        | molecular distance edge between secondary C and tertiary C                                   | 2.349                |
| VP-7 <sup>b</sup>           | Evaluates the Kier & Hall Chi path indices of order 7                                        | 2.314                |
| APC2D5_C_Cl <sup>d</sup>    | Count of C-Cl at topological distance 5                                                      | 2.267                |
| BCUTdv-1f <sup>c</sup>      | first lowest eigenvalue of Burden matrix weighted by valence electrons                       | 2.237                |
| ATSC3dv <sup>c</sup>        | Returns the number of atoms in the largest pi chain                                          | 2.204                |
| ZMIC5 <sup>c</sup>          | 5-ordered Z-modified information content                                                     | 2.196                |
| Mi <sup>c</sup>             | A variety of descriptors combining surface area and partial charge informatio                | 2.111                |

Features used for principal component analysis (PCA) and the training models. <sup>a</sup>Mean importance of descriptors (meanImp) was calculated using Boruta. Descriptors generated using <sup>b</sup>CDK, <sup>c</sup>Mordred, and <sup>d</sup>PaDEL-Descriptor.

**Table S3. Training set statistics of the final models.**

| Algorithm | $R^2$ | RMSE  |
|-----------|-------|-------|
| RF        | 0.955 | 0.205 |
| GB        | 0.970 | 0.149 |
| R-SVM     | 0.892 | 0.281 |
| L-SVM     | 0.711 | 0.446 |
| PLS       | 0.536 | 0.563 |

These scores were calculated using selected parameters of each machine learning algorithm for training set.

From these tables (Table S3 and Table 4 in the main text), the possibility of over fitting of our GB model was shown. From these tables (Table S3 and Table 4 in the main text), the possibility of over fitting of our GB model was shown, thus, more amount of data of  $f_{u, \text{brain}}$  are required to be published for model construction.



**Table S4. Predictive Result of the Random Forest (RF) Method for All Descriptors.**

| Evaluation              | $R^2$ | $RMSE$ |
|-------------------------|-------|--------|
| Out-of-bag <sup>a</sup> | 0.556 | 0.551  |
| Test set <sup>b</sup>   | 0.532 | 0.551  |

<sup>a</sup> Out-of-bag used instead of cross-validation; <sup>b</sup> Optimized model with mtry = 442.

The RF algorithm has a function to select important descriptors for training within the algorithm.<sup>3</sup> An  $f_{u,brain}$  predictive model was constructed with RF using the same training and test compounds used in previous models to confirm the predictive ability of this method for all or selected descriptors.

A total of 7,513 descriptors were generated with near-zero variance or high correlation descriptors filtered; 868 descriptors were retained for further analysis. As a result of the training conducted on these descriptors, 442 was selected as a suitable parameter for mtry, and statistical scores for evaluation were calculated using the test compounds (Table S1).

As a result of the comparison between all and selected descriptors, the RF model-trained descriptors selected by Boruta had slightly higher performance in both out-of-bag and test set validation. The descriptors chosen as the important features in RF were similar to the descriptors selected by Boruta (Table 2). Boruta is a wrapper algorithm with a combination of RF in the decision of importance for each descriptor. Using descriptors selected by Boruta for RF training did not affect our data.

**Table S5. List of the 20 Most Important Descriptors Selected by Random Forest (RF).**

| Descriptor                  | Detail                                                                                       | Importance <sup>a</sup> |
|-----------------------------|----------------------------------------------------------------------------------------------|-------------------------|
| SLogP <sup>c</sup>          | Wildman-Crippen LogP                                                                         | 100.00                  |
| SMR_VSA7 <sup>c</sup>       | MOE MR VSA Descriptor 7 (3.05 <= x < 3.63)                                                   | 42.46                   |
| APC2D6_C_X <sup>d</sup>     | Count of C-X at topological distance 6                                                       | 30.18                   |
| MDEC-22 <sup>b</sup>        | molecular distance edge between secondary C and secondary C                                  | 25.89                   |
| FPSA3 <sup>c</sup>          | fractional charged partial positive surface area (version 3)                                 | 25.73                   |
| GATS1p <sup>c</sup>         | geary coefficient of lag 1 weighted by polarizability                                        | 25.09                   |
| AATSC0m <sup>c</sup>        | Polar surface area expressed as a ratio to molecular size                                    | 24.75                   |
| AETA_alpha <sup>c</sup>     | averaged ETA core count                                                                      | 23.62                   |
| khs.aaCH <sup>b</sup>       | Counts the number of occurrences of the E-state fragments                                    | 22.99                   |
| AATSC0p <sup>c</sup>        | averaged and centered moreau-broto autocorrelation of lag 0 weighted by polarizability       | 21.94                   |
| tpsaEfficiency <sup>b</sup> | Polar surface area expressed as a ratio to molecular size                                    | 21.74                   |
| ATSC0m <sup>c</sup>         | centered moreau-broto autocorrelation of lag 0 weighted by mass                              | 21.45                   |
| APC2D7_C_N <sup>d</sup>     | Count of C-N at topological distance 7                                                       | 21.24                   |
| JGI9                        | 9-ordered mean topological charge                                                            | 20.26                   |
| AATS5p <sup>c</sup>         | averaged moreau-broto autocorrelation of lag 5 weighted by polarizability                    | 20.25                   |
| APC2D9_C_X <sup>d</sup>     | Count of C-X at topological distance 9                                                       | 19.74                   |
| AATS1p <sup>c</sup>         | averaged moreau-broto autocorrelation of lag 1 weighted by polarizability                    | 19.62                   |
| AATSC1f <sup>c</sup>        | averaged and centered moreau-broto autocorrelation of lag 1 weighted by ionization potential | 19.58                   |
| SubFPC274 <sup>d</sup>      | Count of aromatic substructure                                                               | 19.58                   |
| ATSC6v <sup>c</sup>         | centered moreau-broto autocorrelation of lag 6 weighted by                                   | 19.53                   |

| Descriptor | Detail     | Importance <sup>a</sup> |
|------------|------------|-------------------------|
|            | vdw volume |                         |

The 868 filtered descriptors were used for descriptor selection and model building in RF training.

<sup>a</sup>The importance of the descriptors was scaled, assuming the value of the most important descriptor as 100.00 in RF. All descriptors were generated using <sup>b</sup>CDK, <sup>c</sup>Mordred, and <sup>d</sup>PaDEL-Descriptor.

To select important descriptors, we employed Boruta and Random Forest in this study. In these methods, important descriptors are randomly selected and evaluated in each branch of trees. Table S4 contains the MDEC-22 (molecular distance edge between secondary C and secondary C) within the first 20 descriptors (in the top 4) in the importance score of 25.89. However, it was placed in the top 32 descriptors in the meanImp of 3.162 in Table S2.

The scores of importance and meanImp of MDEC-22 were approximately one of three of that of SLogP, which is the most important descriptor in both RF and Boruta selections. Thus, it seems MDEC-22 was randomly selected as having a higher importance than other descriptors in RF and accidentally had a lower order in Boruta selection. The values of MDEC-22 imply that they are reasonable for descriptor selection and were selected without bias.

## References

1. Wan, H.; Åhman, M.; Holmen, A. G. Relationship Between Brain Tissue Partitioning and Microemulsion Retention Factors of CNS Drugs. *J. Med. Chem.*, **2009**, *52*, 1693-1700.
2. Mateus, A.; Matsson, P.; Artursson, P. A High-Throughput Cell-Based Method to Predict the Unbound Drug Fraction in the Brain. *J. Med. Chem.*, **2014**, *57*, 3005-3010.
3. Breiman, L. Random Forest, *Machine Learning*, **2001**, *45*, 5-32.
